# Supplementary material for: Lean Tissue Imaging: A New Era for Nutritional Assessment and Intervention [image]
Source: PubMed Central journal article supplement — JPEN J Parenter Enteral Nutr. 2014 Nov;38(8):940–53. doi: 10.1177/0148607114550189 (PMC4361695; doi:10.1177/0148607114550189), 2014-11
Supplement: JPEN_38_8_CE_Information_Sheet.pdf [file JPEN_38_8_CE_Information_Sheet.pdf]

## A.S.P.E.N Journal-based Continuing Education (CE) Activity

### Journal Article Title and Citation:

Lean Tissue Imaging: A New Era for Nutritional Assessment and Intervention, *JPEN*, November 2014

### Journal-based CE Activity Overall Goal:

The *JPEN* Editor, in concurrence with A.S.P.E.N.'s Education and Professional Development Committee, selected this article to be offered for CE credit to fill an observed learning need in the arena of clinical nutrition and metabolism. This CE activity serves to promote the process of life-long learning for physicians, dietitians, pharmacists, and nurses by providing peer-reviewed journal articles that fully qualify for continuing education credits.

### Goal and Target Audience:

This educational activity is directed toward clinical nutrition and metabolism professionals and others who wish to update their knowledge of clinical nutrition and metabolism. By participating in this educational activity, the reader may expect to:

- Acquire knowledge in the area of clinical nutrition and metabolism research
- Update or confirm your understanding of appropriate clinical nutrition and metabolism practices.
- Identify further learning needs as they relate to the subject matter.

### Learning Objectives:

1. Define commonly used terminology in the assessment of body composition;
2. Identify key body composition measurement methods and the compartments being evaluated;
3. Differentiate among the modalities in the assessment of lean soft tissue and the main principles governing these techniques (DXA, CT, MRI and US imaging);
4. Identify opportunistic use of imaging techniques in the clinical setting;
5. Summarize the value of assessing lean soft tissue in view of its relationship with clinical outcomes in a variety of scenarios and how clinical practice is evolving to incorporating the use of these measurements.

**Successful Completion:** To obtain CE credit for this activity, attendees must read the journal article in its entirety, complete an online assessment for each article and achieve a score of 100%, and complete an online activity evaluation. All are located in A.S.P.E.N.'s eLearning Center – [www.nutritioncare.org/elearning](http://www.nutritioncare.org/elearning).

### Accreditation Statements/Continuing Education Credit: Nurses

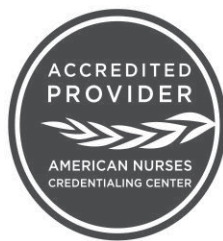

A.S.P.E.N. is accredited as a provider of continuing nursing education by the American Nurses Credentialing Center's Commission on Accreditation.

This activity is for a maximum of 1 contact hours per journal article.

A.S.P.E.N. is approved by the California Board of Registered Nursing, Provider CEP 3970, for 1 contact hour per article.

### Pharmacists

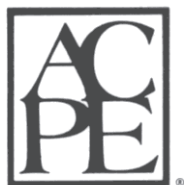

A.S.P.E.N. is accredited by the Accreditation Council for Pharmacy Education as a provider of continuing pharmacy education.

This activity is for a maximum of 1 contact hours (.1 CEU) per journal article. ACPE UAN: 0216-0000-14-126-H04-P. Knowledge activity.

### Dietitians

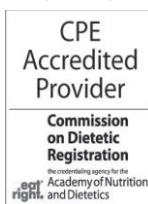

A.S.P.E.N., Provider Number AM005, is a Continuing Professional Education (CPE) Accredited Provider with the Commission on Dietetic Registration (CDR). Registered dietitians (RDs) and dietetic technicians, registered (DTRs) will receive a maximum of 1 continuing professional education units (CPEU) for completion of each journal article. CDR level 2. Dietitians may post comments on this program on [www.cdrnet.org](http://www.cdrnet.org).

### Physicians

Provider 0002345

A.S.P.E.N. is accredited by the Accreditation Council for Continuing Medical Education to provide continuing medical education for physicians.

A.S.P.E.N. designates this journal-based CME activity for a maximum of 1 *AMA PRA Category 1 Credits*<sup>TM</sup> per article. Physicians should only claim credit commensurate with the extent of their participation in the activity.

### Policies/Information:

- Release and Expiration: Release date: November 1, 2014. Expiration date: November 30, 2015. All CE credit must be claimed by the expiration date in A.S.P.E.N.'s eLearning Center – [www.nutritioncare.org/elearning](http://www.nutritioncare.org/elearning).
- Non-Commercialism: A.S.P.E.N. subscribes to the ACCME Standards for Commercial Support. A.S.P.E.N. does not provide programs that constitute advertisement or include promotional materials. A.S.P.E.N. does not endorse any products.
- Computer Requirements and Technical Support: Participants will need a computer with internet connection to access the online assessment and evaluation for each journal article. If the journal article is read electronically, then the ability to read a PDF document is also necessary. Users should enable pop-ups if attempting to read article electronically. For technical difficulties please contact Digitell Inc. Customer Support at: 1-800-679-3646. *Office hours are between 9AM to 5PM ET, Monday through Friday*
- Privacy and Confidentiality: A.S.P.E.N. respects the privacy of its members and website visitors. Companies that receive personal information from A.S.P.E.N. in order to execute the business of A.S.P.E.N. may use personal information only for that purpose.
- Refund Policy: Refunds are not available.
- Grievances: Grievances must be submitted in writing to Director of Education at A.S.P.E.N. 8630 Fenton Street, Suite 412. Silver Spring, MD 20910.

### Commercial Support and Sponsorship:

No commercial support or sponsorship has been received for this continuing education activity.

### Commercial Relationships Disclosures and Conflicts of Interest (COI) of Authors and Journal Editors

Carla Prado Received travel funds as a consultant with GTx, Inc. Advised company on data analysis of a clinical trial of enobosarm. Peer review process resolves any potential conflicts.

Steven Heymsfield received honorarium for serving on the Tanita Corporation Medical Advisory Board. Advised company on technical aspects of product development. Peer review process resolves any potential conflicts.

*JPEN* Associate Editors, David August, Lingtak-Neander Chan, Jean-Charles Preiser, Diana Mager: nothing to disclose. Mark Puder has served on the Pronova advisory board and received grant funding and consulting fee.

*JPEN* Editor-in-Chief Kelly Tappenden has served as a consultant for NPS Pharmaceuticals, Inc and Abbott Nutrition. Has received honoraria for both roles.

No conflicts related to disclosure information present and subsequently no need for resolution. Standard journal peer review process also in place as another layer of review to ensure no conflicts to resolve.
